# 1                    **Studying ecosystems with DNA**

## 2                    **metabarcoding: lessons from aquatic**

### 3                    **biomonitoring**

4    **Alex Bush<sup>1\*</sup>, Zacchaeus Compson<sup>1</sup>, Wendy Monk<sup>1,2</sup>, Teresita M. Porter<sup>3,4</sup>, Royce Steeves<sup>5</sup>,**  
5    **Erik Emilson<sup>3</sup>, Nellie Gagne<sup>5</sup>, Mehrdad Hajibabaei<sup>4</sup>, Mélanie Roy<sup>5</sup>, Donald J. Baird<sup>1</sup>**

6    1. Environment and Climate Change Canada @ Canadian Rivers Institute, Department of  
7    Biology, University of New Brunswick, Fredericton, NB Canada

8    2. Faculty of Forestry and Environmental Management, University of New Brunswick,  
9    Fredericton, Canada.

10   3. Great Lakes Forestry Centre, Natural Resources Canada, 1219 Queen Street East, Sault  
11   Ste. Marie, ON Canada

12   4. Centre for Biodiversity Genomics and Department of Integrative Biology, University of  
13   Guelph, 50 Stone Road East, Guelph, ON Canada

14   5. Department for Fisheries and Oceans, Gulf Fisheries Centre, 343 Université Avenue  
15   Moncton, NB Canada

16   \* Corresponding author: [alexalbush@gmail.com](mailto:alexalbush@gmail.com)

17  
18  
19   Running title: Studying ecosystems with DNA metabarcoding

20  
21   Word count: 6,950

22  
23   Keywords: biodiversity observation, high-throughput sequencing, taxonomic resolution,  
24   community ecology, environmental genomics

## 27 **Abstract**

28 An ongoing challenge for ecological studies has been the collection of data with high precision  
29 and accuracy at a sufficient scale to detect effects relevant to management of critical global  
30 change processes. A major hurdle for many workflows has been the time-consuming and  
31 challenging process of sorting and identification of organisms, but the rapid development of  
32 DNA metabarcoding as a biodiversity observation tool provides a potential solution. As high-  
33 throughput sequencing becomes more rapid and cost-effective, a 'big data' revolution is  
34 anticipated, based on higher and more accurate taxonomic resolution, more efficient detection,  
35 and greater sample processing capacity. These advances have the potential to amplify the  
36 power of ecological studies to detect change and diagnose its cause, through a methodology  
37 termed 'Biomonitoring 2.0'.

38 Despite its promise, the unfamiliar terminology and pace of development in high-  
39 throughput sequencing technologies has contributed to a growing concern that an unproven  
40 technology is supplanting tried and tested approaches, lowering trust among potential users,  
41 and reducing uptake by ecologists and environmental management practitioners. While it is  
42 reasonable to exercise caution, we argue that any criticism of new methods must also  
43 acknowledge the shortcomings and lower capacity of current observation methods. Broader  
44 understanding of the statistical properties of metabarcoding data will help ecologists to design,  
45 test and review evidence for new hypotheses.

46 We highlight the uncertainties and challenges underlying DNA metabarcoding and  
47 traditional methods for compositional analysis, focusing on issues of taxonomic resolution,  
48 sample similarity, taxon misidentification, sample contamination, and taxon abundance. Using  
49 the example of freshwater benthic ecosystems, one of the most widely-applied non-microbial  
50 applications of DNA metabarcoding to date, we explore the ability of this new technology to

- 51 improve the quality and utility of ecological data, recognising that the issues raised have
- 52 widespread applicability across all ecosystem types.

## 53 **Introduction**

54 Biodiversity loss and the risks it poses to ecosystem functions and services remain a major  
55 societal concern (Cardinale et al. 2012), but due to a lack of consistently-observed data, there is  
56 no consensus regarding the speed or severity of this decline (Vellend et al. 2013; Newbold et al.  
57 2015). There are very few ecosystems in which we can quantify the magnitude of degradation,  
58 nor can we discriminate among multiple stressors, both key goals for environmental monitoring  
59 programs (Bonada et al. 2006). The power to detect change in ecological communities has  
60 been hampered by sampling costs predominantly associated with human labour and travel. As a  
61 result, ecosystem monitoring programs must manage a trade-off between the scope of a study,  
62 including the phylogenetic breadth of taxon coverage and the resolution to which taxa are  
63 described, and its spatial and temporal coverage (e.g. tropical forests Gardner et al. 2008;  
64 marine sediments Musco et al. 2009). A history of such trade-offs has led to entrenched  
65 practices relying on observation of a narrow range of taxa, which aim to provide a surrogate for  
66 the full biodiversity complement, yet whose taxonomic, spatial or temporal relationships are  
67 largely undefined (Lindenmayer & Likens 2011). The troubling reality is that management  
68 decisions are informed by very limited and potentially biased information, generated by  
69 approaches that no longer reflect our understanding of how ecosystems and species interact  
70 (Woodward, Gray & Baird 2013).

71  
72 Fortunately, technological advances offer the opportunity to generate high-quality biodiversity  
73 data in a consistent manner, radically expanding the scope of ecosystem monitoring (e.g.  
74 Turner 2014; Bush et al. 2017). One of the most promising of these is the technique of DNA  
75 metabarcoding, which supports the massively-parallelised taxonomic identification of organism  
76 assemblages within a biological sample. The application of this method in ecosystem  
77 monitoring, termed “Biomonitoring 2.0” (Baird & Hajibabaei 2012) uses this approach to support

78 the generation of higher level ecological knowledge that supports advances in our  
79 understanding of metacommunity and food-web theory (Bohan et al. 2017). When fully realised,  
80 DNA metabarcoding will provide a universal platform to identify any, and potentially all,  
81 phylogenetic groups occurring within an ecosystem, including many taxa currently not  
82 identifiable by expert taxonomists (e.g. streams: Sweeney et al. 2011; rainforest: Brehm et al.  
83 2016; marine zooplankton: Zhang et al. 2018). As DNA sequencing capacity continues to  
84 increase, there is a growing interest from ecological researchers and environmental managers  
85 for guidance in how to apply these new tools, and to provide clear evidence of their value  
86 relative to existing microscopy-based methods. However, it is important to emphasise that  
87 comparisons between traditional morphological identifications and DNA sequences are far from  
88 straightforward. For example, while metabarcoding can observe the occurrence of DNA  
89 sequences within a specified environmental matrix (e.g. soil sample), it does not currently  
90 discriminate between intact, living organisms and their presence as parts, ingested, or  
91 extraneous tissue. While some may see this as a challenge to be overcome, to retrofit a new  
92 method to an old system of observation, we view this as an opportunity to expand our universe  
93 of interest and gain new insight into ecosystem structure and function (Bohan et al. 2017). Using  
94 data from our own and other studies, we explore the uncertainties surrounding both traditional  
95 and DNA-based observation approaches. Our examples are drawn largely from recent research  
96 on river ecosystems, a research area with a long history and strong linkages with regulatory  
97 application for assessing the state of the environment (Friberg et al. 2011; Leese et al. 2018).

98

99 Aquatic researchers have long recognised the challenges of taxonomic identification and  
100 resulting limitations it imposes on the scale and scope of observational, experimental and  
101 monitoring studies (Jones 2008). Freshwater monitoring programs rely upon a subset of taxa,  
102 primarily aquatic macroinvertebrates, fish, or algae, with little consistency across environmental  
103 agencies or regions (Friberg et al. 2011), and sparse spatial and temporal coverage and limited

104 taxonomic resolution (e.g. Orlofske & Baird 2013) ultimately constrains outcomes to 'pass/fail'  
105 (impacted/non-impacted; Clarke et al. 2006; Strachan & Reynoldson 2014), with causes of  
106 degradation inferred rather than supported by direct evidence. After decades of research, our  
107 ability to disentangle the influence of even the most basic drivers that impact the state of  
108 freshwater ecosystems is still limited (Woodward, Gray & Baird 2013).

## 109 **Our unit and universe of observation**

110 The science of aquatic biomonitoring is based on the principle that site-level observations of  
111 biological assemblage structure integrate responses to prevailing environmental conditions over  
112 space and time, reducing the intensity of sampling required to detect stressor-related changes  
113 in the environment, and providing an immediate signal of “ecosystem health” (Friberg et al.  
114 2011). However, consistently observing more than a narrow range of taxa within an ecological  
115 community has proved costly and impractical, with accuracy of identification often unrecorded or  
116 difficult to quantify, and varying across taxa. The observation universe is further constrained by  
117 sampling method (e.g. mesh-size of collection nets), rather than common phylogenetic or  
118 ecological characteristics, with further downgrading or exclusion of groups that are difficult to  
119 identify (e.g. Vlek, Šporka & Krno 2006). Even with the best taxonomic expertise available, it is  
120 practically impossible to identify all specimens to species-level, since many early life-stages lack  
121 necessary diagnostic features (Orlofske & Baird 2013). Species are subsequently aggregated at  
122 higher taxonomic ranks, obscuring species-level responses, constraining our knowledge of  
123 whether species’ environmental preferences are conserved or variable (Macher et al. 2016;  
124 Beermann et al. 2018). In our view, the level of observation provided by direct morphological  
125 identification of biological specimens in a sample is highly variable (typically referred to as  
126 “lowest taxonomic level”), disconnected from ecological theory, and contains an unknown yet  
127 potentially significant degree of bias (Jones 2008).

128

129 Ecological field studies inevitably face budgetary constraints, and DNA metabarcoding offers the  
130 potential to reduce many of the costs involved in routine morphological identification (Ji et al.  
131 2013). While single-specimen DNA barcoding uses short genetic sequences to identify  
132 individual taxa, often at the species-level, metabarcoding supports simultaneous identification of  
133 entire assemblages of organism via high-throughput sequencing (Taberlet et al. 2012; Yu et al.  
134 2012). Metabarcoding has now been applied in a wide range of aquatic ecosystems (e.g. rivers:  
135 Hajibabaei et al. 2011; wetlands: Gibson et al. 2015; lakes: Bista et al. 2017) and used to  
136 describe community composition in a wide variety of taxa (e.g. worms: Vivien et al. 2015;  
137 insects: Emilson et al. 2017; diatoms: Vasselon et al. 2017).

138

139 When combined with appropriate bioinformatics tools, DNA-based identification can generate  
140 lists of taxa that are typically far richer than those generated by morphological identification  
141 (Sweeney et al. 2011; Gibson et al. 2015). This is further enhanced by expanding DNA barcode  
142 reference libraries (e.g. Curry et al. 2018) and by machine-learning algorithms (Porter &  
143 Hajibabaei 2018c). This has the potential to remove a significant impediment in field ecological  
144 studies, which need no longer be constrained by available taxonomic expertise. This new  
145 observation paradigm supports a definable universe of observation based on the types of DNA  
146 barcodes sequenced (see also below).

## 147 **Defining the universe of observation with metabarcoding**

148 While metabarcoding offers the potential to observe a greater diversity of freshwater taxa, the  
149 requirement to amplify extracted DNA to generate sufficient material for sequencing places  
150 limitations on simultaneous, universal taxonomic observation. The selection of primers used to  
151 amplify specific DNA sequence marker regions is crucial to any metabarcoding study, since they

152 are necessarily tailored to the taxonomic groups under study (Hajibabaei et al. 2012; Gibson et  
153 al. 2014). In order to expand taxonomic coverage, it is necessary to employ a range of primers  
154 and marker sequences (see Fig.3 in Gibson et al. 2014). Considerable efforts have been made  
155 to develop and refine primers for different taxonomic groups or species, and primers with broad  
156 coverage for invertebrates have now been established (e.g. Hajibabaei et al. 2012; Elbrecht &  
157 Leese 2017). However, amplification bias due to variable affinity among sequence variants for  
158 amplification can distort the relationship between sample biomass and the number of sequence  
159 reads (Elbrecht & Leese 2015; Zhang et al. 2018). Metabarcoding can therefore support a  
160 taxonomically broad universe of observation, but outputs should be treated as occurrences and  
161 do not currently support reliable estimation of organism biomass or abundance.

162

163 Before discussing the parallels and differences between morphology-based monitoring and  
164 metabarcoding, two key issues must be highlighted: the distinction between bulk-community  
165 sampling and environmental DNA (eDNA), and the choice of primers. eDNA samples focus on a  
166 signal derived predominantly from traces of intracellular and extracellular DNA without  
167 attempting to isolate organisms (e.g. from water or soil; Cristescu & Hebert 2018), whereas  
168 bulk-community samples include eDNA, but target the collection of whole organisms. eDNA can  
169 be effective in detecting biological signal from the environment, but the significant spatial and  
170 temporal uncertainty of that signal clouds its application in observational studies. As a result, our  
171 examples of metabarcoding below focus entirely on observations derived from bulk-community  
172 samples that are otherwise identical to traditional monitoring surveys.

## 173 **Interpretation**

174 The statistical power and precision of any ecological assessment based on sample assemblage  
175 composition depends upon how results are combined and scored, and how identification errors



176 (i.e. false-presences and false-absences) can obscure the calibration of baseline composition,  
177 limiting our ability to detect deviations from this baseline and infer that change has occurred  
178 (e.g. Clarke et al. 2002; Clarke 2009). Although many sources of uncertainty affect our ability to  
179 infer regional and landscape-level trends from site-level observations, these are difficult to  
180 address with traditional approaches (Clarke 2009; Carstensen & Lindegarth 2016). To illustrate  
181 this problem, we focus on how five sources of error involved in describing freshwater  
182 biodiversity differ between morphological and metabarcoding workflows: a) taxonomic  
183 resolution, b) replicate similarity, c) taxonomic misidentification, d) contamination, and e)  
184 quantitative measures like abundance.

### 185 **Taxonomic resolution**

186 Biomonitoring 2.0 (Baird & Hajibabaei, 2012) employs metabarcoding to overcome the  
187 taxonomic bottleneck of sample processing, removing a critical trade-off between sample  
188 taxonomic resolution and the number of samples that can be studied (Jones 2008). Moreover,  
189 sample metrics derived from higher taxonomic categories, such as family- or genus-level, make  
190 a tacit assumption that species within those higher categories share similar environmental  
191 responses, and possess similar ecological functions. However, when studies are able to  
192 differentiate taxa at the species level, this assumption is false (e.g. nutrient and sediment  
193 sensitivity; Macher et al. 2016; Beermann et al. 2018), and this can significantly influence study  
194 outcomes (Hawkins et al. 2000; Schmidt-Kloiber & Nijboer 2004; Sweeney et al. 2011).

195

196 Observing taxonomic assemblages at genus- or family-level masks turnover in composition,  
197 reducing our power to detect subtle changes among communities over space and time. As each  
198 species is less common than its parent taxonomic group, there will be fewer observations with  
199 which to establish reliable associations, and their inclusion could add noise to statistical models,  
200 echoing the long-running debate about the value of rare taxa in biomonitoring (Nijboer &

201 Schmidt-Kloiber 2004). This “noise” is not only due to the stochastic occurrence of uncommon  
202 species, but also sampling error, which can be quantified before discarding data (Clarke 2009;  
203 Ficetola, Taberlet & Coissac 2016; Guillera-Aroita 2016). We should therefore be particularly  
204 cautious about concluding how taxonomic resolution affects the strength of statistical  
205 relationships (Arscott, Jackson & Kratzer 2006; Martin, Adamowicz & Cottenie 2016). Instead,  
206 our current challenge is understanding when these subtle changes, previously invisible to  
207 traditional monitoring, are related to natural environmental factors or anthropogenic disturbance.  
208

209 One criticism of DNA metabarcoding is that high taxonomic resolution is not valuable if those  
210 taxa cannot be linked to a binomial taxonomic name, a limitation that emerges when barcode  
211 reference libraries are incomplete (Curry et al. 2018). However, many methods of ecological  
212 assessment evaluate community level characteristics such as alpha- and beta-diversity, that do  
213 not retain taxon identity, particularly at the species-level (Pawlowski et al. 2018). For this  
214 reason, interest in taxonomy-free approaches is increasing among those studying poorly-known  
215 assemblages whose morphological identification is challenging (e.g. meiofauna or diatoms:  
216 Vasselon et al. 2017). Moreover, new metrics could improve compatibility between  
217 biogeographically separated programs (Turak et al. 2017). Nonetheless, to tie DNA-based  
218 monitoring to historic surveys, and to assign ancillary information such as traits, it is still a  
219 requirement to assign taxonomic names to identified sequences (e.g. Compson et al. 2018).  
220 Based on the wealth of ecological information available that could complement DNA-based  
221 ecological studies, and the considerable body of legacy data generated by historical studies,  
222 including regulatory monitoring, increasing reference library coverage should be a priority for  
223 management agencies transitioning to DNA-based surveys.

## 224 **Replicate similarity**

225 Depending on the scale of observation, species are rarely distributed randomly or uniformly in  
226 nature. For example, the distribution of macroinvertebrate taxa in streams is notoriously  
227 dynamic, as species adjust to changes in both abiotic (e.g. flow velocity, substratum size) and  
228 biotic (e.g. fish predation, mussel aggregation) factors (Downes, Lake & Schreiber 1993;  
229 Vaughn & Spooner 2006). Heterogeneity may also result from stochastic processes such as  
230 dispersal and colonization (Fonseca & Hart 2001), ephemeral resources (Lancaster & Downes  
231 2014), or disturbance regimes at multiple scales (Effenberger et al. 2006). Indeed,  
232 heterogeneity is so pervasive that a shift towards greater homogeneity within aquatic  
233 communities could indicate human modification of the landscape (Petsch 2016). Given such  
234 heterogeneity, the challenge for ecological studies or biomonitoring is to detect a sufficient  
235 proportion of the community, whilst also minimising processing costs, so that further detections  
236 are unlikely to alter the interpretation of subsequent analyses. Counting all individuals in a  
237 sample can have value, but it is prohibitive for routine observational studies, and not cost-  
238 effective for biomonitoring purposes (e.g. Vlek, Šporka & Krno 2006). Most studies therefore  
239 employ subsampling (i.e. identifying a subset of individuals collected from the field) to reduce  
240 the time, effort and cost of processing macroinvertebrate samples. However, reducing the effort  
241 per sampling unit can significantly underestimate the richness per sample (Doberstein, Karr &  
242 Conquest 2000; Buss et al. 2014) and although subsampling is standardized by volume, weight,  
243 or number of individuals, it is often difficult to compare among survey methods and  
244 biomonitoring schemes (Buss et al. 2014). Although sensitivity to subsampling depends on the  
245 metric employed, subsampling can substantially increase the misclassification of site status  
246 (Clarke et al. 2006; Petkovska & Urbanič 2010) and exaggerate the perceived rarity of many  
247 taxa, whose exclusion from analyses may further bias interpretations of condition (Schmidt-  
248 Kloiber & Nijboer 2004).

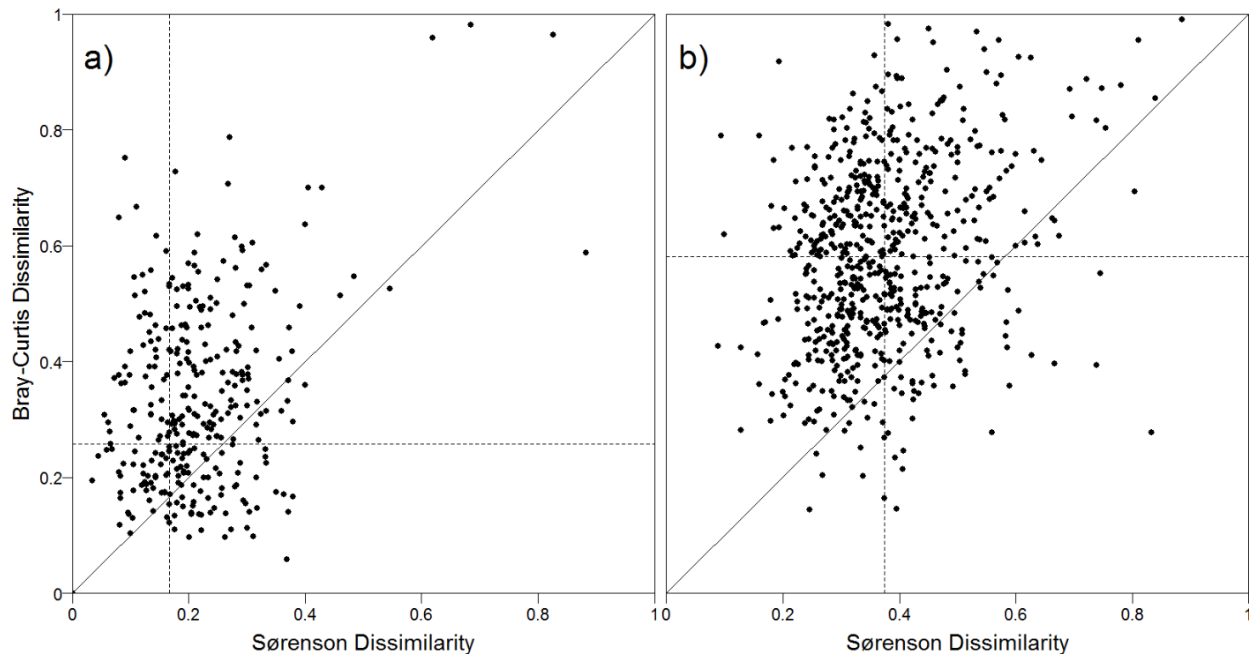

249

250 **Figure 1** - Dissimilarity between replicate samples based on presence/absence data

251 (Sørensen), and count data (Bray-Curtis) of morphologically identified macroinvertebrate

252 families from a) 417 CABIN (Canadian Aquatic Biomonitoring Network; ECCC 2018) surveys

253 (total  $n=1656$ , mean richness= $16 \pm 4.8$ ), and b) 787 surveys from the STAR-AQEM dataset

254 (total  $n=1673$ ) from 14 European countries (mean richness= $51 \pm 18.4$ ; (Furse et al. 2006;

255 Schmidt-Kloiber et al. 2014).

256

257 Regardless of the sub-sampling approach, a single sample only recovers a subset of the

258 community, particularly in heterogeneous environments (Fig. 1 & 2). As sampling effort

259 increases, either by area or time, more taxa are recovered until the rate of new discoveries

260 declines (Vlek, Šporka & Krno 2006). The rate of accumulation depends on taxon abundance

261 distributions, their dispersion, and ease of collection, including the effects of environment on

262 collection efficiency (Guillera-Aroita 2016). For example, a typical 3-minute kick-sample

263 recovered only 50% of the macroinvertebrates species, and 60% of the families, found in total

264 from six replicate samples (Furse et al. 1981). Other standardized protocols observe a similar

265 degree of turnover among replicates (Fig. 1).

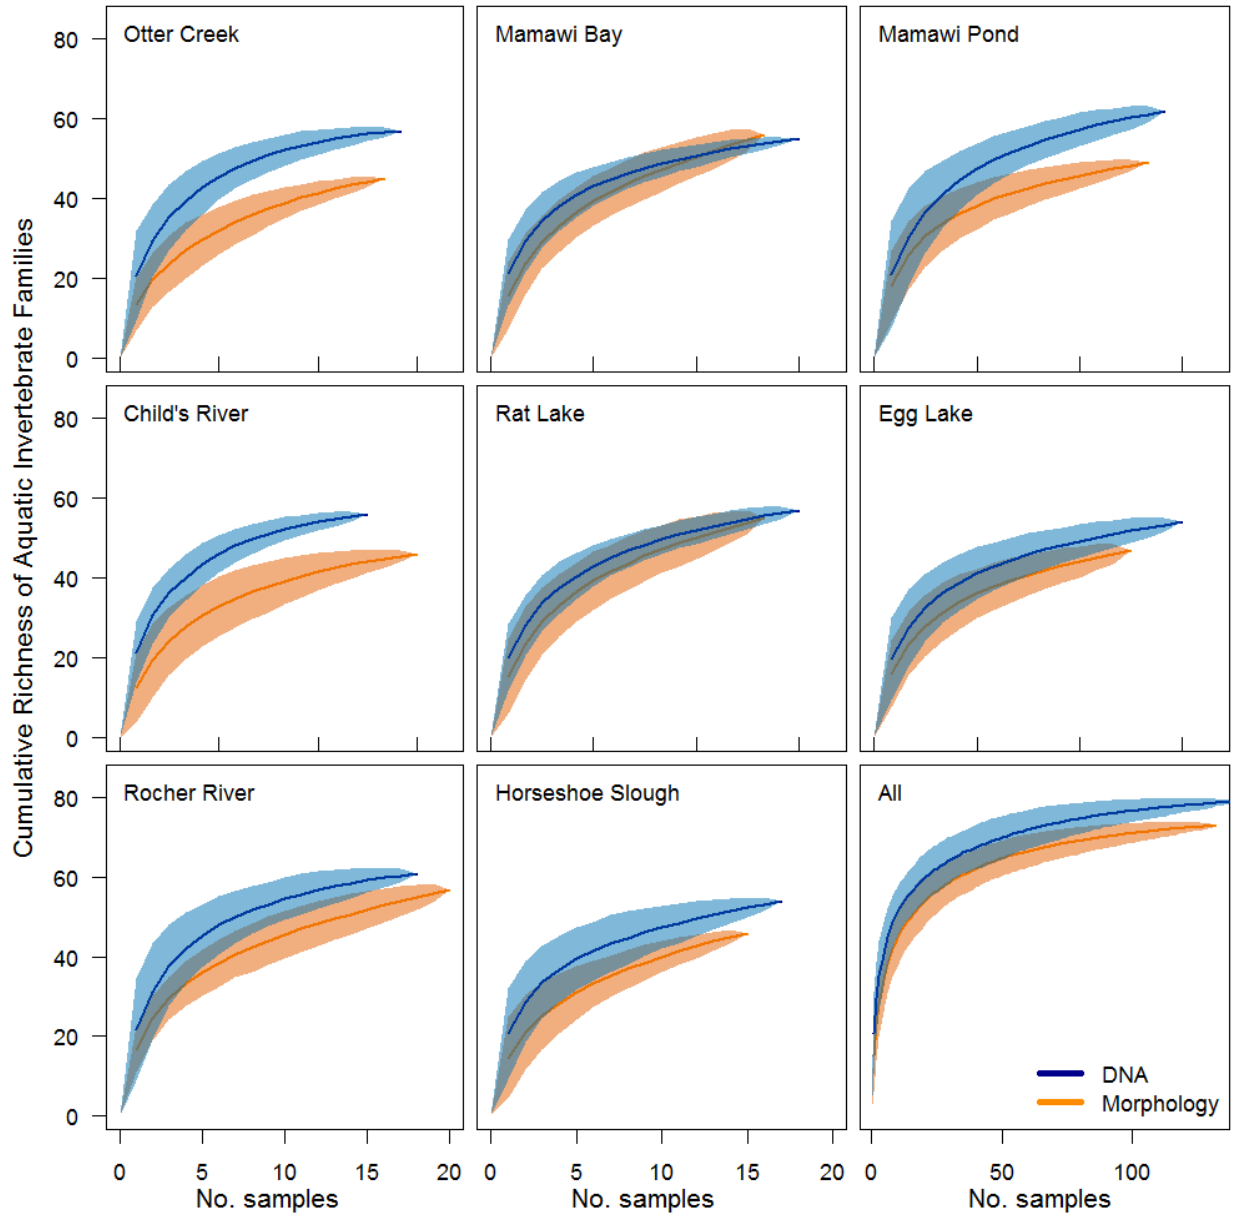

266

267 **Figure 2** - Accumulated richness (mean  $\pm$  95% confidence interval) of aquatic invertebrate  
268 families from 8 wetland sites in the Peace-Athabasca Delta, and for all samples combined (note  
269 different scale). Samples were collected between 2011 and 2016 (updated from surveys  
270 published in Gibson et al. 2015).

271

272 Metabarcoding can, in principle, substantially reduce this sampling error, since the entire  
273 sample is processed (but see also limitations associated with primer selection discussed below).

274 False absences can be further reduced by rarefying the number of taxa observed per read and  
275 by analysing technical replicates (i.e. multiple DNA aliquots from sample extracts). Although  
276 low-biomass, low abundance taxa may still be missed (Hajibabaei et al. 2012; Elbrecht, Peinert  
277 & Leese 2017), metabarcoding detects a higher proportion of the target assemblage compared  
278 to morphologically-identified samples (Fig. 2), thereby increasing the power of monitoring  
279 programs to detect change.

## 280 **Misidentification**

281 Morphological identification of diverse taxonomic groups, such as invertebrates, is challenging,  
282 as demonstrated by a lack of reliable species-level data generated by routine biomonitoring  
283 programs. The probability of misidentifying an individual depends on the quality of the specimen  
284 (e.g. is the specimen partial or complete? Is it mature or immature?), the availability and  
285 completeness of identification keys, and the taxonomist's experience. Though most  
286 biomonitoring programs now include a process for quality control and assessment to limit the  
287 likelihood of misidentification, false positives and negatives are still common. For example, early  
288 audits of the RIVPACS program showed that 8.3% of family occurrences were missed, and  
289 approximately one false presence was added in every four samples (Clarke 2009). Similarly, an  
290 audit of a range of European programs by Haase et al. (2006) found that after accounting for  
291 misidentifications and sorting errors, samples were on average 40% dissimilar to their initial  
292 composition. These errors compound the loss of taxa during sub-sampling, but remain difficult  
293 to predict.

294

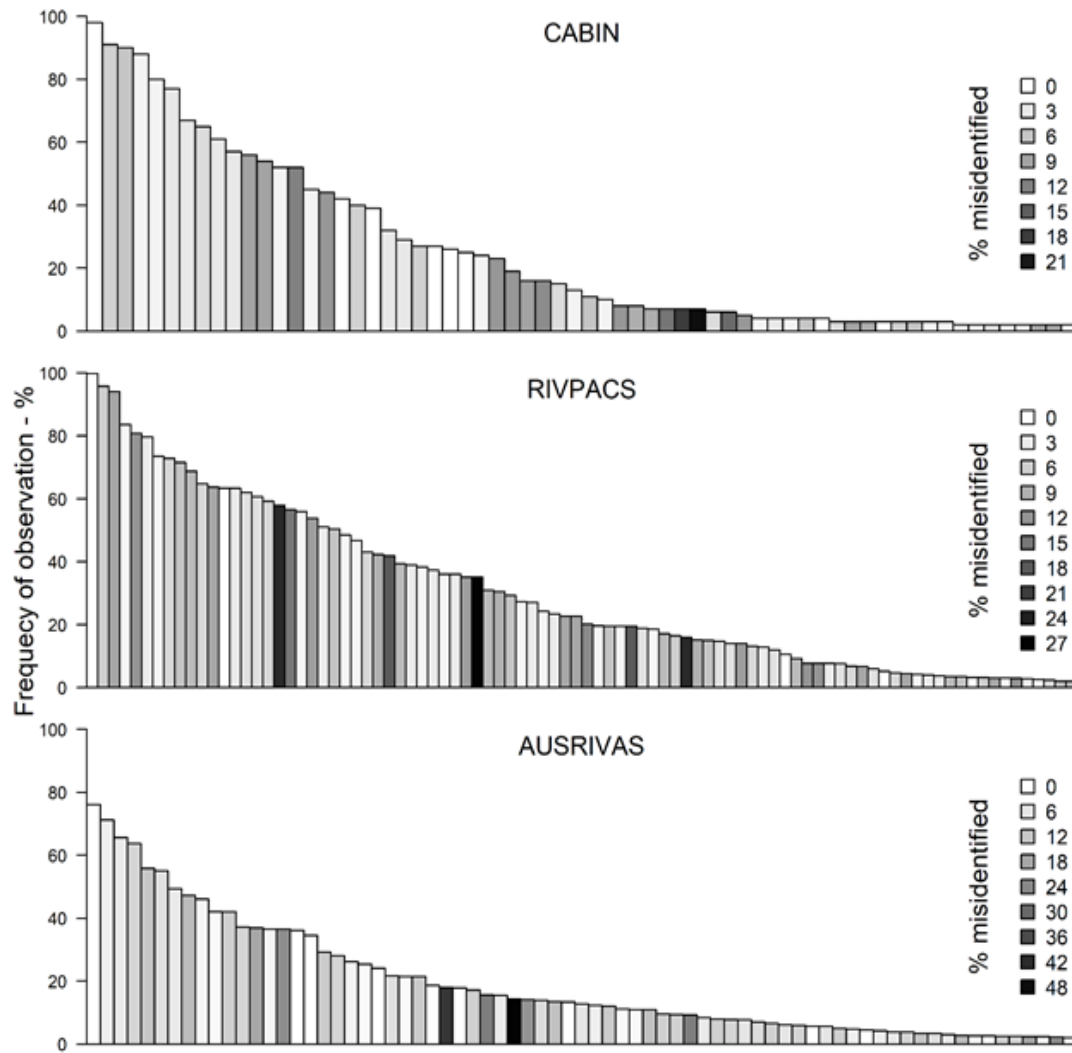

295

296 **Figure 3** - Families ordered by frequency of occurrence within three biomonitoring programs:  
297 the CABIN ( $n = 540$ ), the UK River Invertebrate Prediction and Classification System  
298 (RIVPACS,  $n=2,504$ ), and the Australian River Assessment System (AUSRIVAS  $n=1,516$ ) from  
299 Victoria. Shading reflects the likelihood taxa could be misidentified using the CO1 RDP classifier  
300 v.3 (see Supplement 1 for further details).

301

302 A major advantage of metabarcoding over traditional morphological identification is the ability to  
303 generate accurate identifications in a consistent manner (Orlofske & Baird 2013; Jackson et al.  
304 2014). That said, the accuracy of metabarcoding still depends on the taxonomic coverage and

305 quality of reference DNA sequences used for taxonomic inference as well as the bioinformatics  
306 approaches employed (Porter & Hajibabaei 2018b). If organisms are misidentified at the time of  
307 sequence deposition, reference library sequences become associated with an incorrect  
308 taxonomic name. To minimise this challenge, the Barcode of Life Database (BOLD) stores  
309 information on voucher specimens, supporting linkage of sequences to material in curated  
310 reference specimen collections. Overall, database coverage for animals is expanding rapidly  
311 (Porter & Hajibabaei 2018b) and is already relatively high for freshwater invertebrates. For  
312 example, sequences exist for 95% of the genera observed in >1% of samples collected by the  
313 Canadian national biomonitoring program (Curry et al. 2018; see also Leese et al. 2018). The  
314 current BOLD reference library is better suited to identifying macroinvertebrate families routinely  
315 observed in Canada, reflecting the greater effort on DNA barcode library development in that  
316 country when compared to Australia and the UK (Figure 3). Consequently, at the time of writing,  
317 a routine Bayesian classifier (Porter & Hajibabaei 2018a) is expected to misidentify 4.4%, 6.1%  
318 and 7.7% of families within CABIN, RIVPACS and AUSRIVAS programs respectively. It cannot  
319 be overstated that this is a significant improvement on the documented ability of current best-  
320 available morphological identification, and is accompanied by an ability to drill down to species-  
321 level, which will only improve as DNA libraries become more complete. To further improve DNA-  
322 based identification by barcodes, agencies considering the transition to metabarcoding should  
323 support targeted specimen collection, and accelerate the digitisation of existing museum-  
324 collected material to improve geographic and taxonomic library coverage (Stokstad 2018).

## 325 **Contamination**

326 The detection sensitivity of metabarcoding has raised concerns that the number of false  
327 positives will increase, particularly due to the adventitious introduction of DNA that did not  
328 originate from the sampled site. Existing ecological sampling protocols often recommend  
329 cleaning of equipment between surveys to reduce transfer of invasive species or pathogens,



330 and a more rigorous version of this practice should be adopted as standard practice to reduce  
331 the possibility of cross-sample contamination with DNA. Quality control and assurance practices  
332 are particularly crucial in eDNA studies that amplify trace amounts of DNA; these studies often  
333 include various controls, such as samples from localities that are believed to lack the target  
334 taxa, extraction blanks, and equipment controls. A combination of replicate sampling and  
335 appropriate controls can then quantify the rate of false-positives and false-negatives before  
336 observations are confirmed (Ficetola et al. 2015). Thus, although it is difficult to eliminate the  
337 possibility of cross-contamination altogether, it is possible to greatly reduce its occurrence and  
338 precisely quantify the probability of errors to support study quality assurance and control.

### 339 **Quantitative measures of biodiversity**

340 As stated above, DNA metabarcoding results do not currently produce a reliable signal of  
341 abundance or biomass (Elbrecht & Leese 2015). Nonetheless, it is equally misleading to  
342 suggest that current biomonitoring practices are themselves able to effectively detect  
343 differences in macroinvertebrate abundance without substantial effort. The difficulty of  
344 processing samples, coupled with species' patchy distributions, means few studies can claim to  
345 have truly quantified patterns of abundance for multispecies invertebrate assemblages (e.g.  
346 Hawkins et al. 2000).

347

348 Obtaining a reliable estimate of taxon abundance or biomass can support studies of many key  
349 ecological processes, but for the specific purposes of detecting compositional change,  
350 abundance information is most useful when responses can indicate a shift in species  
351 dominance without a change in composition. This is particularly true in depauperate systems, if  
352 species are pooled at higher taxonomic levels, or rare taxa are discarded (Reynoldson et al.  
353 1997). Nonetheless, differences in the composition of diverse assemblages are often sufficient  
354 to discriminate among sites, even at relatively coarse taxonomic resolution (Thorne, Williams &

355 Cao 1999; Hawkins et al. 2000), thus the challenge has always been the reliable identification of  
356 those taxa. While count or relative abundance information may provide another axis for  
357 discrimination, its inherent variability exaggerates the dissimilarity among replicate samples  
358 (Fig. 1), rendering baseline conditions more variable, thus reducing statistical power to detect  
359 change. These limitations are well illustrated by studies that have replaced quantitative count  
360 data with qualitative categories or occurrence data (e.g. Wright et al. 1984; Armanini et al.  
361 2013). These approaches have proved acceptable to practitioners precisely because count data  
362 provide little or no incremental improvement to detecting differences among sites. Moreover,  
363 approaches based on occurrence data illustrate a direct pathway to implement DNA  
364 metabarcoding in routine biomonitoring programs.

### 365 **Performance**

366 The relative advantages of DNA metabarcoding over morphological methods are necessarily  
367 contingent on the nature and scope of the question being investigated. Bonada et al. (2006)  
368 reviewed the requirements of biomonitoring studies to detect the occurrence and intensity of  
369 anthropogenic impacts, and Dafforn et al. (2016) explored their applicability to answer questions  
370 over a range of spatial and temporal scales. As they are driven by regulatory needs, most  
371 monitoring programs focus on relatively simple outcomes (e.g. local deviation from baseline;  
372 categorical quality assessment), and thus can greatly benefit from increased precision and  
373 statistical power. Recent freshwater ecosystem studies have demonstrated that metabarcoding  
374 data can support detection of ecological change at a greater level of discrimination than  
375 traditional approaches (Gibson et al. 2015; Elbrecht et al. 2017; Emilson et al. 2017). Although  
376 regulators have thus far remained hesitant to transition to monitoring with metabarcoding, these  
377 early studies have highlighted a lack of precision and consistency in the application of existing  
378 morphological approaches, shortcomings of traditional morphological observation that too often  
379 are either ignored or unrecognized by current practitioners.

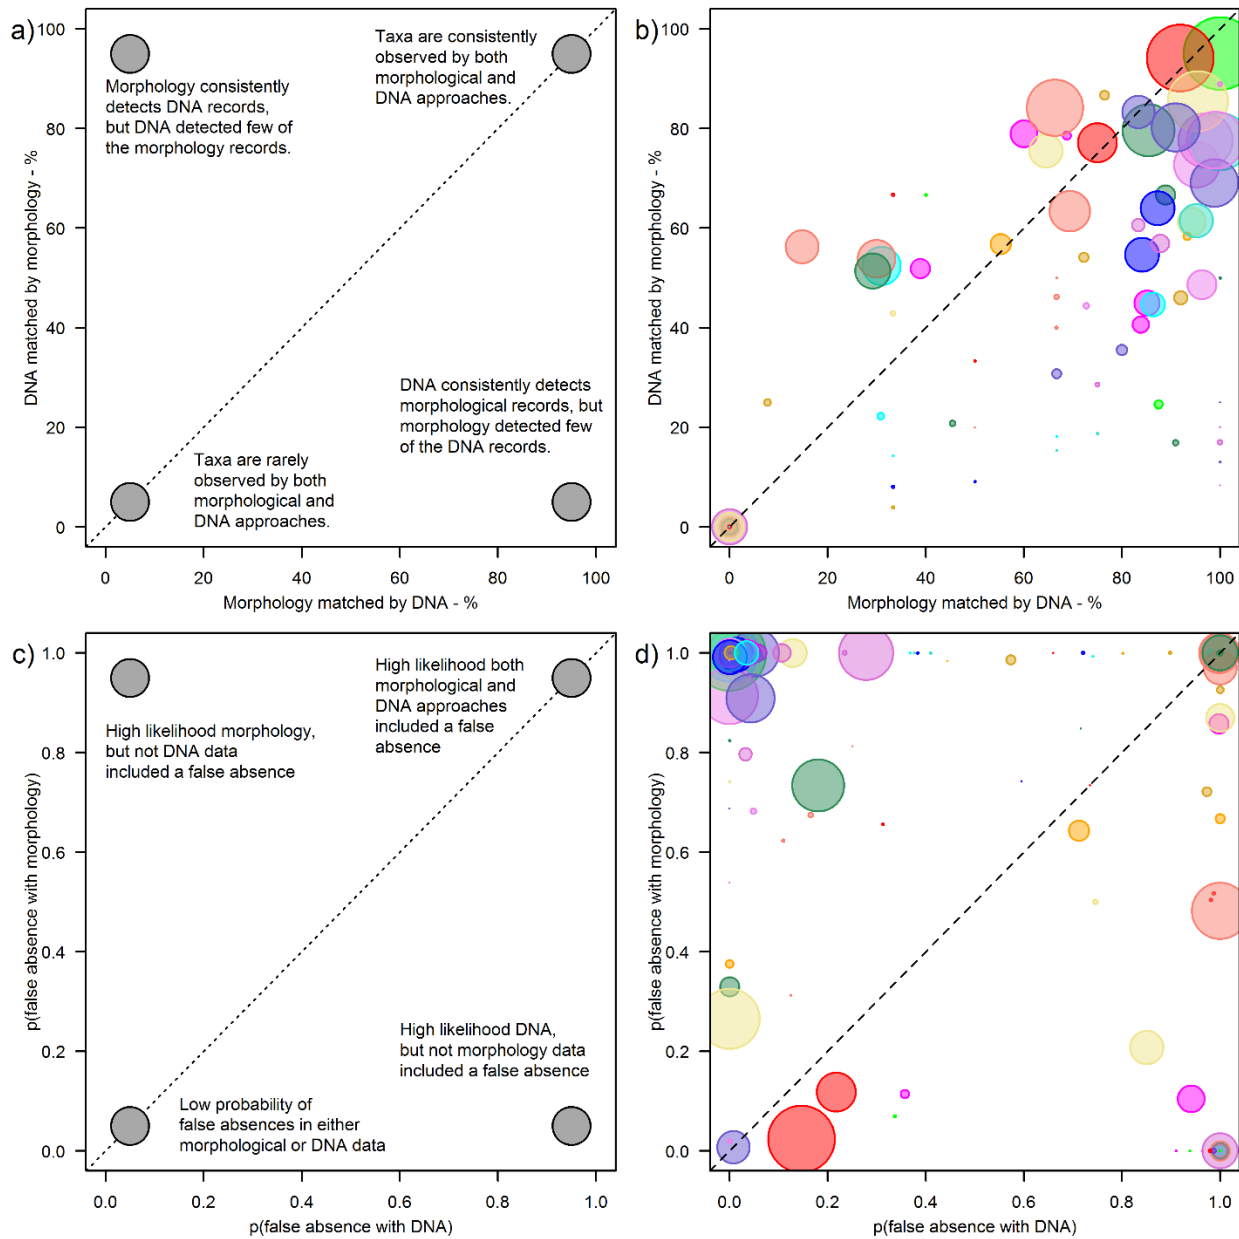

380  
381 **Figure 4** Comparison of macroinvertebrate families (n=114) observed in pairs of standard 3-  
382 minute river benthos kick samples (n=141 sites). Top row (a and b) shows the correspondence  
383 between observations of each taxonomic family using either morphological identification or DNA  
384 metabarcoding. Points are scaled relative to the number of morphological observations. Bottom  
385 row (c and d) shows the probability that each method included at least one false absence for  
386 each taxon (see Supplement 2 for code and raw data).

387

388 Our purpose in developing DNA metabarcoding as an observational tool has been to explore its  
389 ability to provide consistently-observed information to answer routine questions posed by  
390 managers (e.g. is biological composition at a site significantly different from expectations, and if  
391 so, is there evidence of impact?). Comparisons between metabarcoding and morphology-based  
392 methods have involved sorting and identification of a sample using existing taxonomic keys,  
393 followed by the reassembly of the sample for metabarcoding (Hajibabaei et al. 2012; but see  
394 Gibson et al. 2015). These approaches have demonstrated that DNA metabarcoding recovered  
395 ~90% of the taxa identified by morphology, and all false-absences were from taxa that  
396 represented <1% of individuals. Most recently, we have also evaluated the similarity of taxa  
397 recovered by metabarcoding using paired samples (Fig. 4; GRDI-Ecobiomics 2017). The  
398 average similarity of morphological and metabarcoded samples at family-level was 73%, within  
399 the range of variation expected for replicate samples (Fig. 1; Clarke et al. 2002). Of the families  
400 observed by both methods, DNA observed 79% of the observations made by morphology,  
401 whereas morphology only matched 61% of those made by DNA. Some families also appear to  
402 be consistently under-represented or absent from this DNA dataset (Fig.4a-b, bottom-left), most  
403 likely due to a combination of gaps in the reference library (aquatic mites and oligochaetes in  
404 particular) and primer bias (Gibson et al. 2014; Elbrecht et al. 2017). Beyond mere overlap, a  
405 better estimate of performance could be the likelihood each family was missed based on their  
406 detectability in replicate samples (Fig.4b). Both methods are likely to have missed many families  
407 at least once, but the mean and likelihood of multiple false absences was lower among  
408 metabarcoding samples than for samples identified by morphology (Supplement 2).

409

410 While primer bias remains an issue, the composition recovered by DNA metabarcoding is  
411 always likely to be a subset of all taxa in diverse systems. Nonetheless, metabarcoding provides  
412 a step-change in taxonomic coverage, in terms of the taxonomic breadth of taxa observed,  
413 improved taxonomic resolution, and fewer false negatives. Compared to traditional

414 morphological methods, metabarcoding representing a major advance in how consistently we  
415 observe the taxonomic structure of ecological communities.

## 416 **Conclusions**

417 Biomonitoring 2.0 (Baird & Hajibabaei 2012) envisaged the use of DNA metabarcoding to  
418 generate consistently-observed biodiversity data to detect environmental change efficiently and  
419 rapidly. This can be done with only minor modification of existing sample collection methods,  
420 ensuring backwards compatibility with legacy data. Higher taxonomic resolution, more efficient  
421 detection (Fig. 2), and the capacity to increase spatiotemporal coverage can all increase the  
422 statistical power to detect change and diagnose its cause (Bonada et al. 2006).

423

424 Study design and interpretation should acknowledge the sources of uncertainty in both  
425 morphological and metabarcoding approaches. Although abundance information is specified by  
426 existing programs (Leese et al. 2018), it is not necessary to achieve biomonitoring goals and  
427 many robust methods that use occurrence information already exist. Sources of uncertainty  
428 associated with metabarcoding can be quantified and minimised more easily than morphological  
429 approaches (e.g. Davis et al. 2018), and once standard operating procedures emerge, many  
430 tasks can be automated, further reducing the risk of handling errors and the costs of sequencing  
431 (Porter & Hajibabaei 2018c). A transition to large-scale observation by metabarcoding will take  
432 time as sequencing still requires specialized technicians and facilities. However, as demand  
433 grows, we anticipate organisations will outsource their DNA sample processing to specialist  
434 labs, equivalent to the current use of private consultants for taxonomic and chemical analyses.  
435 Currently, the cost of processing an invertebrate community sample (from DNA-extraction to  
436 sequencing) is approximately half the cost of morphological identification by taxonomists, but as

437 we have stressed, the divergent properties of each approach make it misleading to base  
438 comparisons on costs alone.

439

440 We can only manage what we can measure, and at present the unknown magnitude and  
441 consequences of global biodiversity loss emphasize the value of metabarcoding as a technique  
442 to support improved ecological observation in all field studies of multispecies assemblages.  
443 Moving forward, we expect the increasing number of metabarcoding studies to further refine the  
444 uncertainties associated with observations, and the exchange of information should accelerate  
445 as research activities in this area grow, spearheading large-scale implementation of  
446 metabarcoding. Metabarcoding is also being used for increasingly novel applications, such as  
447 the study of trophic interactions (Bohan et al. 2017), meta-community theory (Miller, Svanbäck &  
448 Bohannan 2018), and ecosystem function relationships (Vamosi et al. 2017), and these  
449 applications could generate substantial added value to existing or future biomonitoring programs  
450 (Compson et al. 2018).

## 451 Acknowledgements

452 We thank Guy Woodward, Richard Marchant, Astrid Schmidt-Kloiber and Daniel Hering for  
453 providing data from monitoring programs in the UK, Australia and EU. This work was supported  
454 by the Ontario Genomics Institute and Genome Canada, NSERC, Environment and Climate  
455 Change Canada program funds and the Canadian federal Genomics Research & Development  
456 Initiative.

457

## 458 References

- 459 1. Armanini, D.G. et.al. (2013) Towards generalised reference condition models for  
460 environmental assessment: a case study on rivers in Atlantic Canada. *Environmental*  
461 *Monitoring and Assessment*, 185, 6247-6259.
- 462 2. Arscott, D.B. et.al. (2006) Role of rarity and taxonomic resolution in a regional and  
463 spatial analysis of stream macroinvertebrates. *Journal of the North American*  
464 *Benthological Society*, 25, 977-997.
- 465 3. Baird, D. & Hajibabaei, M. (2012) Biomonitoring 2.0: a new paradigm in ecosystem  
466 assessment made possible by next-generation DNA sequencing. *Molecular Ecology*, 21,  
467 2039-2044.
- 468 4. Beermann, A.J. et.al. (2018) DNA metabarcoding reveals the complex and hidden  
469 responses of chironomids to multiple stressors. *Environmental Sciences Europe*, 30, 26.
- 470 5. Bista, I. et.al. (2017) Annual time-series analysis of aqueous eDNA reveals ecologically  
471 relevant dynamics of lake ecosystem biodiversity. *Nature Communications*, 8, 14087.
- 472 6. Bohan, D.A. et.al. (2017) Next-Generation Global Biomonitoring: Large-scale,  
473 Automated Reconstruction of Ecological Networks. *Trends in Ecology & Evolution*.
- 474 7. Bonada, N. et.al. (2006) Developments in Aquatic Insect Biomonitoring: A Comparative  
475 Analysis of Recent Approaches. *Annual Review of Entomology*, 51, 495–523.
- 476 8. Brehm, G. et.al. (2016) Turning Up the Heat on a Hotspot: DNA Barcodes Reveal 80%  
477 More Species of Geometrid Moths along an Andean Elevational Gradient. *PLoS ONE*,  
478 11, e0150327.
- 479 9. Bush, A. et.al. (2017) Connecting Earth observation to high-throughput biodiversity data.  
480 *Nature Ecology and Evolution*, 1, 0176.

- 481 10. Buss, D.F. et.al. (2014) Stream biomonitoring using macroinvertebrates around the  
482 globe: a comparison of large-scale programs. *Environmental Monitoring and*  
483 *Assessment*, 187, 4132.
- 484 11. Cardinale, B.J. et.al. (2012) Biodiversity loss and its impact on humanity. *Nature*, 486,  
485 59-67.
- 486 12. Carstensen, J. & Lindegarth, M. (2016) Confidence in ecological indicators: A framework  
487 for quantifying uncertainty components from monitoring data. *Ecological Indicators*, 67,  
488 306-317.
- 489 13. Clarke, R. (2009) Uncertainty in WFD assessments for rivers based on  
490 macroinvertebrates and RIVPACS. Integrated catchment science programme Science  
491 report: SC060044/SR4, pp. 1-87. Bristol, UK.
- 492 14. Clarke, R.T. et.al. (2002) Sampling variation in macroinvertebrate data and implications  
493 for river quality indices. *Freshwater Biology*, 47, 1735-1751.
- 494 15. Clarke, R.T. et.al. (2006) Effects of sampling and sub-sampling variation using the  
495 STAR-AQEM sampling protocol on the precision of macroinvertebrate metrics.  
496 *Hydrobiologia*, 566, 441-459.
- 497 16. Compson, Z.G. et.al. (2018) Linking DNA Metabarcoding and Text Mining to Create  
498 Network-Based Biomonitoring Tools: A Case Study on Boreal Wetland  
499 Macroinvertebrate Communities. *Advances in Ecological Research*. Academic Press.
- 500 17. Cristescu, M.E. & Hebert, P.D.N. (2018) Uses and Misuses of Environmental DNA in  
501 Biodiversity Science and Conservation. *Annual Review of Ecology, Evolution, and*  
502 *Systematics*, 49, null.
- 503 18. Curry, C.J. et.al. (2018) Identifying North American freshwater invertebrates using DNA  
504 barcodes: are existing COI sequence libraries fit for purpose? *Freshwater Science*, 37,  
505 178-189.



- 506 19. Dafforn, K.A. et.al. (2016) Big data opportunities and challenges for assessing multiple  
507 stressors across scales in aquatic ecosystems. *Marine and Freshwater Research*, 67,  
508 393.
- 509 20. Davis, A.J. et.al. (2018) Accounting for observation processes across multiple levels of  
510 uncertainty improves inference of species distributions and guides adaptive sampling of  
511 environmental DNA. *Ecology and Evolution*, 8, 10879-10892.
- 512 21. Doberstein, C.P. et.al. (2000) The effect of fixed-count subsampling on  
513 macroinvertebrate biomonitoring in small streams. *Freshwater Biology*, 44, 355-371.
- 514 22. Downes, B.J. et.al. (1993) Spatial variation in the distribution of stream invertebrates:  
515 implications of patchiness for models of community organization. *Freshwater Biology*,  
516 30, 119-132.
- 517 23. ECCC (2018) CABIN Canadian Aquatic Biomonitoring Network. Environment and  
518 Climate Change Canada, [https://open.canada.ca/data/en/dataset/13564ca4-e330-40a5-](https://open.canada.ca/data/en/dataset/13564ca4-e330-40a5-9521-bfb1be767147)  
519 [9521-bfb1be767147](https://open.canada.ca/data/en/dataset/13564ca4-e330-40a5-9521-bfb1be767147)
- 520 24. Effenberger, M. et.al. (2006) Local disturbance history and habitat parameters influence  
521 the microdistribution of stream invertebrates. *Freshwater Biology*, 51, 312-332.
- 522 25. Elbrecht, V. & Leese, F. (2015) Can DNA-Based Ecosystem Assessments Quantify  
523 Species Abundance? Testing Primer Bias and Biomass—Sequence Relationships with  
524 an Innovative Metabarcoding Protocol. *PLoS ONE*, 10, e0130324.
- 525 26. Elbrecht, V. & Leese, F. (2017) Validation and Development of COI Metabarcoding  
526 Primers for Freshwater Macroinvertebrate Bioassessment. *Frontiers in Environmental*  
527 *Science*, 5.
- 528 27. Elbrecht, V. et.al. (2017) Sorting things out: Assessing effects of unequal specimen  
529 biomass on DNA metabarcoding. *Ecology and Evolution*, 7, 6918-6926.

- 530 28. Elbrecht, V. et.al. (2017) Assessing strengths and weaknesses of DNA metabarcoding-  
531 based macroinvertebrate identification for routine stream monitoring. *Methods in Ecology*  
532 *and Evolution*, 8, 1265-1275.
- 533 29. Emilson, C.E. et.al. (2017) DNA metabarcoding and morphological macroinvertebrate  
534 metrics reveal the same changes in boreal watersheds across an environmental  
535 gradient. *Scientific Reports*, 7, 12777.
- 536 30. Ficetola, G.F. et.al. (2015) Replication levels, false presences and the estimation of the  
537 presence/absence from eDNA metabarcoding data. *Molecular Ecology Resources*, 15,  
538 543-556.
- 539 31. Ficetola, G.F. et.al. (2016) How to limit false positives in environmental DNA and  
540 metabarcoding? *Molecular Ecology Resources*, 16, 604-607.
- 541 32. Fonseca, D.M. & Hart, D.D. (2001) Colonization history masks habitat preferences in  
542 local distributions of stream insects. *Ecology*, 82, 2897-2910.
- 543 33. Friberg, N. et.al. (2011) Biomonitoring of Human Impacts in Freshwater Ecosystems:  
544 The Good, the Bad and the Ugly. *Advances in Ecological Research* (ed. W. Guy), pp. 1-  
545 68. Academic Press.
- 546 34. Furse, M. et.al. (2006) The STAR project: context, objectives and approaches. *The*  
547 *Ecological Status of European Rivers: Evaluation and Intercalibration of Assessment*  
548 *Methods*, pp. 3-29. Springer Netherlands, Dordrecht.
- 549 35. Furse, M.T. et.al. (1981) An appraisal of pond-net samples for biological monitoring of  
550 lotic macro-invertebrates. *Water Research*, 15, 679-689.
- 551 36. Gardner, T.A. et.al. (2008) The cost-effectiveness of biodiversity surveys in tropical  
552 forests. *Ecology letters*, 11, 139-150.
- 553 37. Gibson, J.F. et.al. (2014) Simultaneous assessment of the macrobiome and microbiome  
554 in a bulk sample of tropical arthropods through DNA metasystematics. *Proceedings of*  
555 *the National Academy of Sciences*, 111, 8007-8012

- 556 38. Gibson, J.F. et.al. (2015) Large-Scale Biomonitoring of Remote and Threatened  
557 Ecosystems via High-Throughput Sequencing. PLoS ONE, 10, e0138432.
- 558 39. GRDI-Ecobiomics (2017) Ecobiomics: Metagenomics Based Ecosystem Biomonitoring  
559 Project, Government of Canada, Genomics R&D Initiative, Year-End Performance  
560 Report for Shared Priority Projects (2017-2018).
- 561 40. Guillera-Arroita, G. (2016) Modelling of species distributions, range dynamics and  
562 communities under imperfect detection: advances, challenges and opportunities.  
563 Ecography, 40, 281-295.
- 564 41. Haase, P. et.al. (2006) Assessing the impact of errors in sorting and identifying  
565 macroinvertebrate samples. Hydrobiologia, 566, 505-521.
- 566 42. Hajibabaei, M. et.al. (2011) Environmental Barcoding: A Next-Generation Sequencing  
567 Approach for Biomonitoring Applications Using River Benthos. PLoS ONE, 6, e17497.
- 568 43. Hajibabaei, M. et.al. (2012) Assessing biodiversity of a freshwater benthic  
569 macroinvertebrate community through non-destructive environmental barcoding of DNA  
570 from preservative ethanol.
- 571 44. Hawkins, C.P. et.al. (2000) Development and Evaluation of predictive models for  
572 measuring the biological integrity of streams. Ecological Applications, 10, 1456-1477.
- 573 45. Jackson, J.K. et.al. (2014) Cryptic biodiversity in streams: a comparison of  
574 macroinvertebrate communities based on morphological and DNA barcode  
575 identifications. Freshwater Science, 33, 312-324.
- 576 46. Ji, Y. et.al. (2013) Reliable, verifiable and efficient monitoring of biodiversity via  
577 metabarcoding. Ecology letters, 16, 1245-1257.
- 578 47. Jones, F.C. (2008) Taxonomic sufficiency: The influence of taxonomic resolution on  
579 freshwater bioassessments using benthic macroinvertebrates. Environmental Reviews,  
580 16, 45-69.

- 581 48. Lancaster, J. & Downes, B.J. (2014) Population densities and density–area relationships  
582 in a community with advective dispersal and variable mosaics of resource patches.  
583 *Oecologia*, 176, 985-996.
- 584 49. Leese, F. et.al. (2018) Chapter Two - Why We Need Sustainable Networks Bridging  
585 Countries, Disciplines, Cultures and Generations for Aquatic Biomonitoring 2.0: A  
586 Perspective Derived From the DNAqua-Net COST Action. *Advances in Ecological*  
587 *Research*, pp. 63-99. Academic Press.
- 588 50. Lindenmayer, D.B. & Likens, G.E. (2011) Direct Measurement Versus Surrogate  
589 Indicator Species for Evaluating Environmental Change and Biodiversity Loss.  
590 *Ecosystems*, 14, 47-59.
- 591 51. Macher, J.N. et.al. (2016) Multiple-stressor effects on stream invertebrates: DNA  
592 barcoding reveals contrasting responses of cryptic mayfly species. *Ecological Indicators*,  
593 61, 159-169.
- 594 52. Martin, G.K. et.al. (2016) Taxonomic resolution based on DNA barcoding affects  
595 environmental signal in metacommunity structure. *Freshwater Science*, 35, 701-711.
- 596 53. Miller, E.T., Svanbäck, R. & Bohannan, B.J.M. (2018) Microbiomes as  
597 Metacommunities: Understanding Host-Associated Microbes through Metacommunity  
598 Ecology. *Trends in Ecology & Evolution*, 33, 926-935
- 599 54. Musco, L. et.al. (2009) Taxonomic structure and the effectiveness of surrogates in  
600 environmental monitoring: a lesson from polychaetes. *Marine Ecology Progress Series*,  
601 383, 199-210.
- 602 55. Newbold, T. et.al. (2015) Global effects of land use on local terrestrial biodiversity.  
603 *Nature*, 520, 45-50.
- 604 56. Nijboer, R.C. & Schmidt-Kloiber, A. (2004) The effect of excluding taxa with low  
605 abundances or taxa with small distribution ranges on ecological assessment.  
606 *Hydrobiologia*, 516, 347-363.

- 607 57. Orlofske, J.M. & Baird, D.J. (2013) The tiny mayfly in the room: implications of size-  
608 dependent invertebrate taxonomic identification for biomonitoring data properties.  
609 Aquatic Ecology, 47, 481-494.
- 610 58. Pawlowski, J. et.al. (2018) The future of biotic indices in the ecogenomic era: Integrating  
611 (e)DNA metabarcoding in biological assessment of aquatic ecosystems. Science of The  
612 Total Environment, 637-638, 1295-1310.
- 613 59. Petkovska, V. & Urbanič, G. (2010) Effect of fixed-fraction subsampling on  
614 macroinvertebrate bioassessment of rivers. Environmental Monitoring and Assessment,  
615 169, 179-201.
- 616 60. Petsch, D.K. (2016) Causes and consequences of biotic homogenization in freshwater  
617 ecosystems. International Review of Hydrobiology, 101, 113-122.
- 618 61. Porter, T. & Hajibabaei, M. (2018a) Over 2.5 million COI sequences in GenBank and  
619 growing. 13, e0200177.
- 620 62. Porter, T.M. & Hajibabaei, M. (2018b) Automated high throughput animal COI  
621 metabarcode classification. Scientific Reports, 8, 4226.
- 622 63. Porter, T.M. & Hajibabaei, M. (2018c) Scaling up: A guide to high-throughput genomic  
623 approaches for biodiversity analysis. Molecular Ecology, 27, 313-338.
- 624 64. Reynoldson, T.B. et.al. (1997) The Reference Condition: A Comparison of Multimetric  
625 and Multivariate Approaches to Assess Water-Quality Impairment Using Benthic  
626 Macroinvertebrates. Journal of the North American Benthological Society, 16, 833-852.
- 627 65. Schmidt-Kloiber, A. & Nijboer, R.C. (2004) The effect of taxonomic resolution on the  
628 assessment of ecological water quality classes. Hydrobiologia, 516, 269-283.
- 629 66. Schmidt-Kloiber, A. et.al. (2014) Description of the AQEM/STAR invertebrate database.  
630 pp. 1-8. Freshwater Metadata Journal.
- 631 67. Stokstad, E. (2018) Researchers launch plan to sequence 66,000 species in the United  
632 Kingdom. Science.

- 633 68. Strachan, S.A. & Reynoldson, T.B. (2014) Performance of the standard CABIN method:  
634 comparison of BEAST models and error rates to detect simulated degradation from  
635 multiple data sets. *Freshwater Science*, 33, 1225-1237.
- 636 69. Sweeney, B.W. et.al. (2011) Can DNA barcodes of stream macroinvertebrates improve  
637 descriptions of community structure and water quality? *Journal of the North American*  
638 *Benthological Society*, 30, 195-216.
- 639 70. Taberlet, P. et.al. (2012) Environmental DNA. *Molecular Ecology*, 21, 1789-1793.
- 640 71. Thorne, R.S.J. et.al. (1999) The influence of data transformations on biological  
641 monitoring studies using macroinvertebrates. *Water Research*, 33, 343-350.
- 642 72. Turak, E. et.al. (2017) Essential Biodiversity Variables for measuring change in global  
643 freshwater biodiversity. *Biological Conservation*, 213, 272-279.
- 644 73. Turner, W. (2014) Sensing biodiversity. *Science*, 346, 301-302.
- 645 74. Vamosi, J.C. et.al. (2017) Forecasting pollination declines through DNA barcoding: the  
646 potential contributions of macroecological and macroevolutionary scales of inquiry. *New*  
647 *Phytologist*, 214, 11-18.
- 648 75. Vasselon, V. et.al. (2017) Assessing ecological status with diatoms DNA metabarcoding:  
649 Scaling-up on a WFD monitoring network (Mayotte Island, France). *Ecological*  
650 *Indicators*, 82, 1-12.
- 651 76. Vaughn, C.C. & Spooner, D.E. (2006) Unionid mussels influence macroinvertebrate  
652 assemblage structure in streams. *Journal of the North American Benthological Society*,  
653 25, 691-700.
- 654 77. Vellend, M. et.al. (2013) Global meta-analysis reveals no net change in local-scale plant  
655 biodiversity over time. *Proceedings of the National Academy of Sciences*, 110, 19456-  
656 19459.
- 657 78. Vivien, R. et.al. (2015) Molecular Barcoding of Aquatic Oligochaetes: Implications for  
658 Biomonitoring. *PLoS ONE*, 10, e0125485.

- 659 79. Vlek, H.E. et.al. (2006) Influence of macroinvertebrate sample size on bioassessment of  
660 streams. *Hydrobiologia*, 566, 523-542.
- 661 80. Woodward, G. et.al. (2013) Biomonitoring for the 21<sup>st</sup> Century: new perspectives in an  
662 age of globalisation and emerging environmental threats. *Limnetica*, 29, 159-174.
- 663 81. Wright, J.F. et.al. (1984) A preliminary classification of running-water sites in Great  
664 Britain based on macro-invertebrate species and the prediction of community type using  
665 environmental data. *Freshwater Biology*, 14, 221-256.
- 666 82. Yu, D.W. et.al. (2012) Biodiversity soup: metabarcoding of arthropods for rapid  
667 biodiversity assessment and biomonitoring. *Methods in Ecology and Evolution*, 3, 613–  
668 623
- 669 83. Zhang, G.K. et.al. (2018) Metabarcoding using multiplexed markers increases species  
670 detection in complex zooplankton communities. *Evolutionary Applications*, 11, 1901-  
671 1914.
- 672
